# Supplementary material for: Sex‐Specific Comparison Between Triglyceride Glucose Index and Modified Triglyceride Glucose Indices to Predict New‐Onset Hypertension in Middle‐Aged and Older Adults
Source: PubMed Central journal article supplement — J Am Heart Assoc. 2023 Sep 16;12(18):e030022. doi: 10.1161/JAHA.123.030022 (PMC10547265; doi:10.1161/jaha.123.030022), 2023-09-16
Supplement: JAH3-12-e030022-s001.pdf [file JAH3-12-e030022-s001.pdf]

# **Supplemental Material**

**Table S1. Baseline characteristics of the study population according to the total, men and women.**

| Variable                         | Total             | Men               | Women             | P-value |
|----------------------------------|-------------------|-------------------|-------------------|---------|
| N                                | 5,414             | 2,568             | 2,846             |         |
| Age (years)                      | 50.1 ± 8.4        | 50.2 ± 8.4        | 50.1 ± 8.4        | 0.819   |
| BMI (kg/m <sup>2</sup> )         | 24.2 ± 3.0        | 23.9 ± 2.8        | 24.4 ± 3.1        | <0.001  |
| Waist circumference (cm)         | 80.9 ± 8.5        | 82.5 ± 7.3        | 79.5 ± 9.2        | <0.001  |
| Waist to height ratio            | 0.50 ± 0.06       | 0.49 ± 0.04       | 0.52 ± 0.06       | <0.001  |
| SBP (mmHg)                       | 112.3 ± 11.5      | 113.5 ± 10.7      | 111.1 ± 12.0      | <0.001  |
| DBP (mmHg)                       | 75.0 ± 8.0        | 76.6 ± 7.4        | 73.5 ± 8.2        | <0.001  |
| FPG (mg/dL)                      | 85.9 ± 19.9       | 88.9 ± 22.4       | 83.2 ± 17.0       | <0.001  |
| Total cholesterol (mg/dL)        | 189.5 ± 34.3      | 191.6 ± 34.8      | 187.6 ± 33.7      | <0.001  |
| Triglyceride (mg/dL)             | 125 (95, 175)     | 139 (103, 196)    | 114 (89, 157)     | <0.001  |
| HDL-cholesterol (mg/dL)          | 45.0 ± 10.0       | 43.4 ± 9.9        | 46.5 ± 9.9        | <0.001  |
| CRP                              | 0.13 (0.06, 0.23) | 0.14 (0.07, 0.24) | 0.12 (0.05, 0.21) | <0.001  |
| TyG                              | 8.6 ± 0.5         | 8.8 ± 0.6         | 8.5 ± 0.5         | <0.001  |
| TyG-BMI                          | 208.8 ± 32.2      | 209.9 ± 32.2      | 207.9 ± 32.1      | 0.019   |
| TyG-WC                           | 699.6 ± 98.1      | 723.9 ± 92.8      | 677.6 ± 97.5      | <0.001  |
| TyG-WHtR                         | 4.4 ± 0.6         | 4.3 ± 0.6         | 4.4 ± 0.7         | <0.001  |
| Smoking status, n(%)             |                   |                   |                   | <0.001  |
| Never smoker                     | 3,176 (58.7%)     | 470 (18.3%)       | 2,706 (95.1%)     |         |
| Former smoker                    | 809 (14.9%)       | 773 (30.1%)       | 36 (1.3%)         |         |
| Intermittent smoker              | 160 (3.0%)        | 130 (5.1%)        | 30 (1.1%)         |         |
| Every day smoker                 | 1,269 (23.4%)     | 1,195 (46.5%)     | 74 (2.6%)         |         |
| Alcohol drinking status, n(%)    |                   |                   |                   | <0.001  |
| Non alcohol drinker              | 2,454 (45.3%)     | 518 (20.2%)       | 1,936 (68.0%)     |         |
| Ex-alcohol drinker               | 325 (6.0%)        | 250 (9.7%)        | 75 (2.6%)         |         |
| Current alcohol drinker          | 2,635 (48.7%)     | 1,800 (70.1%)     | 835 (29.3%)       |         |
| METs (hour/day)                  | 23.2 ± 14.3       | 23.9 ± 14.7       | 22.6 ± 13.9       | <0.001  |
| Anti-diabetes drug use , n(%)    | 91 (1.7%)         | 58 (2.3%)         | 33 (1.2%)         | 0.002   |
| Anti-dyslipidemic drug use, n(%) | 16 (0.3%)         | 12 (0.5%)         | 4 (0.1%)          | 0.050   |

BMI, Body mass index; SBP, Systolic blood pressure; DBP, Diastolic blood pressure; FPG, Fasting plasma glucose; HDL, High density lipoprotein; CRP, C-reactive protein; TyG, Triglyceride and glucose index; WC, Waist circumference; WHtR, Weight to Height ratio; MET, Metabolic equivalent of task.

**Table S2. Incidence of hypertension during follow-up in men and women.**

| Year      | Follow-up | Men              |                   |                               | Women            |                   |                               |
|-----------|-----------|------------------|-------------------|-------------------------------|------------------|-------------------|-------------------------------|
|           |           | Total numbers, n | Incident cases, n | Incident HTN rate per 2 years | Total numbers, n | Incident cases, n | Incident HTN rate per 2 years |
| 2001-2002 | Baseline  | 2,568            |                   |                               | 2,846            |                   |                               |
| 2003-2004 | 2 years   | 2,436            | 288               | 11.8                          | 2,655            | 262               | 9.9                           |
| 2005-2006 | 4 years   | 2,259            | 142               | 6.3                           | 2,451            | 144               | 5.9                           |
| 2007-2008 | 6 years   | 1,888            | 119               | 6.3                           | 2,107            | 119               | 5.6                           |
| 2009-2010 | 8 years   | 1,909            | 164               | 8.6                           | 2,145            | 174               | 8.1                           |
| 2011-2012 | 10 years  | 1,766            | 132               | 7.5                           | 2,061            | 112               | 5.4                           |
| 2013-2014 | 12 years  | 1,672            | 87                | 5.2                           | 1,992            | 97                | 4.9                           |
| 2015-2016 | 14 years  | 1,785            | 82                | 4.6                           | 2,104            | 104               | 4.9                           |

**Table S3. Multiple Cox proportional hazards regression analysis for incident hypertension of tertiles of HOMA-IR and HOMA-beta.**

|                  | Hazard ratio with 95% confidence interval |                  |                  |          |               |                  |                  |          |
|------------------|-------------------------------------------|------------------|------------------|----------|---------------|------------------|------------------|----------|
|                  | Men                                       |                  |                  |          | Women         |                  |                  |          |
|                  | T1                                        | T2               | T3               | <i>p</i> | T1            | T2               | T3               | <i>p</i> |
| <b>HOMA-IR</b>   |                                           |                  |                  |          |               |                  |                  |          |
| Unadjusted       | 1 (reference)                             | 1.12 (0.96–1.30) | 1.34 (1.15–1.55) | <0.001   | 1 (reference) | 1.16 (0.99–1.36) | 1.26 (1.08–1.47) | 0.013    |
| Model 1          | 1 (reference)                             | 1.14 (0.98–1.32) | 1.42 (1.22–1.65) | <0.001   | 1 (reference) | 1.21 (1.03–1.42) | 1.31 (1.12–1.53) | 0.002    |
| Model 2          | 1 (reference)                             | 1.07 (0.92–1.25) | 1.18 (1.00–1.38) | 0.132    | 1 (reference) | 1.13 (0.97–1.33) | 1.11 (0.95–1.30) | 0.261    |
| Model 3          | 1 (reference)                             | 1.06 (0.91–1.24) | 1.12 (0.95–1.33) | 0.391    | 1 (reference) | 1.13 (0.96–1.32) | 1.07 (0.91–1.26) | 0.344    |
| <b>HOMA-beta</b> |                                           |                  |                  |          |               |                  |                  |          |
| Unadjusted       | 1 (reference)                             | 1.03 (0.89–1.19) | 1.09 (0.93–1.27) | 0.592    | 1 (reference) | 0.88 (0.75–1.04) | 0.89 (0.76–1.04) | 0.235    |
| Model 1          | 1 (reference)                             | 1.07 (0.93–1.23) | 1.12 (0.96–1.31) | 0.336    | 1 (reference) | 0.95 (0.81–1.12) | 1.02 (0.87–1.19) | 0.651    |
| Model 2          | 1 (reference)                             | 1.04 (0.90–1.20) | 1.05 (0.90–1.24) | 0.771    | 1 (reference) | 0.95 (0.81–1.12) | 0.99 (0.85–1.16) | 0.786    |
| Model 3          | 1 (reference)                             | 1.11 (0.96–1.30) | 1.16 (0.97–1.38) | 0.208    | 1 (reference) | 0.98 (0.83–1.17) | 1.05 (0.88–1.25) | 0.683    |

HOMA, homeostatic model assessment; IR, insulin resistance; BMI, body mass index; WC, waist circumference; WHtR, weight to height ratio Significance was set at  $p < 0.05$ .

Model 1: Adjusted for age; Model 2: Adjusted for variables used in Model 1 plus BMI, physical activity, smoking status, and current drinker;

Model 3: Adjusted for variables used in Model 2 plus total cholesterol, high density lipoprotein-cholesterol, fasting plasma glucose, C-reactive protein, anti-diabetes drug, and anti-dyslipidemia drug

**Table S4. Multiple Cox proportional hazards regression analysis for incident hypertension of tertiles of TyG and modified TyG indices applying the 2017 AHA/ACC definition of hypertension.**

|                | Hazard ratio with 95% confidence interval |                  |                  |          |               |                  |                  |          |
|----------------|-------------------------------------------|------------------|------------------|----------|---------------|------------------|------------------|----------|
|                | Men                                       |                  |                  |          | Women         |                  |                  |          |
|                | T1                                        | T2               | T3               | <i>p</i> | T1            | T2               | T3               | <i>p</i> |
| <b>TyG</b>     |                                           |                  |                  |          |               |                  |                  |          |
| Unadjusted     | 1 (reference)                             | 1.17 (1.04–1.33) | 1.30 (1.15–1.45) | <0.001   | 1 (reference) | 1.39 (1.24–1.55) | 1.73 (1.53–1.94) | <0.001   |
| Model 1        | 1 (reference)                             | 1.18 (1.04–1.33) | 1.30 (1.16–1.46) | <0.001   | 1 (reference) | 1.24 (1.10–1.39) | 1.44 (1.28–1.63) | <0.001   |
| Model 2        | 1 (reference)                             | 1.10 (0.97–1.25) | 1.11 (0.98–1.26) | 0.201    | 1 (reference) | 1.18 (1.05–1.32) | 1.26 (1.11–1.42) | <0.001   |
| Model 3        | 1 (reference)                             | 1.11 (0.98–1.26) | 1.12 (0.98–1.29) | 0.206    | 1 (reference) | 1.19 (1.06–1.34) | 1.29 (1.12–1.50) | 0.001    |
| <b>TyG-BMI</b> |                                           |                  |                  |          |               |                  |                  |          |
| Unadjusted     | 1 (reference)                             | 1.30 (1.15–1.45) | 1.54 (1.38–1.73) | <0.001   | 1 (reference) | 1.38 (1.23–1.56) | 2.07 (1.84–2.32) | <0.001   |
| Model 1        | 1 (reference)                             | 1.31 (1.17–1.47) | 1.58 (1.41–1.77) | <0.001   | 1 (reference) | 1.32 (1.17–1.49) | 1.85 (1.64–2.08) | <0.001   |
| Model 2        | 1 (reference)                             | 1.10 (0.95–1.26) | 1.12 (0.92–1.36) | 0.419    | 1 (reference) | 1.22 (1.05–1.40) | 1.50 (1.22–1.84) | <0.001   |
| Model 3        | 1 (reference)                             | 1.10 (0.95–1.27) | 1.11 (0.91–1.37) | 0.46     | 1 (reference) | 1.21 (1.05–1.41) | 1.50 (1.20–1.86) | 0.001    |
| <b>TyG-WC</b>  |                                           |                  |                  |          |               |                  |                  |          |
| Unadjusted     | 1 (reference)                             | 1.36 (1.20–1.55) | 1.74 (1.54–1.97) | <0.001   | 1 (reference) | 1.67 (1.49–1.88) | 2.53 (2.26–2.85) | <0.001   |
| Model 1        | 1 (reference)                             | 1.37 (1.21–1.56) | 1.75 (1.55–1.98) | <0.001   | 1 (reference) | 1.46 (1.30–1.65) | 2.00 (1.77–2.26) | <0.001   |

|            |               |                  |                  |        |               |                  |                  |        |
|------------|---------------|------------------|------------------|--------|---------------|------------------|------------------|--------|
| Model 2    | 1 (reference) | 1.22 (1.06–1.40) | 1.42 (1.20–1.68) | <0.001 | 1 (reference) | 1.31 (1.15–1.49) | 1.62 (1.39–1.90) | <0.001 |
| Model 3    | 1 (reference) | 1.25 (1.08–1.44) | 1.48 (1.24–1.77) | <0.001 | 1 (reference) | 1.31 (1.15–1.50) | 1.64 (1.39–1.94) | <0.001 |
| TyG-WHtR   |               |                  |                  |        |               |                  |                  |        |
| Unadjusted | 1 (reference) | 1.45 (1.30–1.63) | 1.71 (1.53–1.92) | <0.001 | 1 (reference) | 1.79 (1.58–2.04) | 2.68 (2.37–3.02) | <0.001 |
| Model 1    | 1 (reference) | 1.46 (1.30–1.63) | 1.71 (1.52–1.92) | <0.001 | 1 (reference) | 1.59 (1.39–1.81) | 2.07 (1.82–2.36) | <0.001 |
| Model 2    | 1 (reference) | 1.29 (1.13–1.46) | 1.40 (1.19–1.64) | <0.001 | 1 (reference) | 1.42 (1.24–1.64) | 1.69 (1.44–1.99) | <0.001 |
| Model 3    | 1 (reference) | 1.31 (1.15–1.50) | 1.45 (1.22–1.72) | <0.001 | 1 (reference) | 1.42 (1.23–1.64) | 1.71 (1.44–2.02) | <0.001 |

: TyG, triglyceride and glucose index; BMI, body mass index; WC, waist circumference; WHtR, weight to height ratio, Significance was set at  $p < 0.05$ .

Model 1: Adjusted for age. Model 2: Adjusted for variables used in Model 1 plus body mass index, physical activity, smoking status, and current drinker.

Model 3: Adjusted for variables used in Model 2 plus total cholesterol, high density lipoprotein-cholesterol, fasting plasma glucose, C- reactive protein, anti-diabetes drug, and anti-dyslipidemic drug

**Table S5. Harrell's concordance index and 95% confidence intervals for predicting hypertension incidence of the TyG, TyG-BMI, TyG-WC and TyG-WHtR using the 2017 AHA/ACC definition of hypertension.**

|          | Men     |             |        |        |       | Women   |             |        |        |        |
|----------|---------|-------------|--------|--------|-------|---------|-------------|--------|--------|--------|
|          | C-index | 95% CI      | P1     | P2     | P3    | C-index | 95% CI      | P1     | P2     | P3     |
| TyG      | 0.546   | 0.531–0.560 | ref    |        |       | 0.567   | 0.553–0.582 | ref    |        |        |
| TyG–BMI  | 0.565   | 0.550–0.579 | <0.001 | ref    |       | 0.582   | 0.568–0.597 | 0.033  | ref    |        |
| TyG-WC   | 0.578   | 0.564–0.593 | <0.001 | <0.001 | ref   | 0.622   | 0.608–0.636 | <0.001 | <0.001 | ref    |
| TyG–WHtR | 0.578   | 0.564–0.593 | <0.001 | <0.001 | 0.984 | 0.629   | 0.615–0.643 | <0.001 | <0.001 | <0.001 |

TyG, triglyceride and glucose index; BMI, body mass index; WC, waist circumference; WHtR, weight to height

**Figure S1. Kaplan–Meier curves for incident hypertension according to TyG, TyG-BMI, TyG-WC and TyG-WHtR tertiles.**

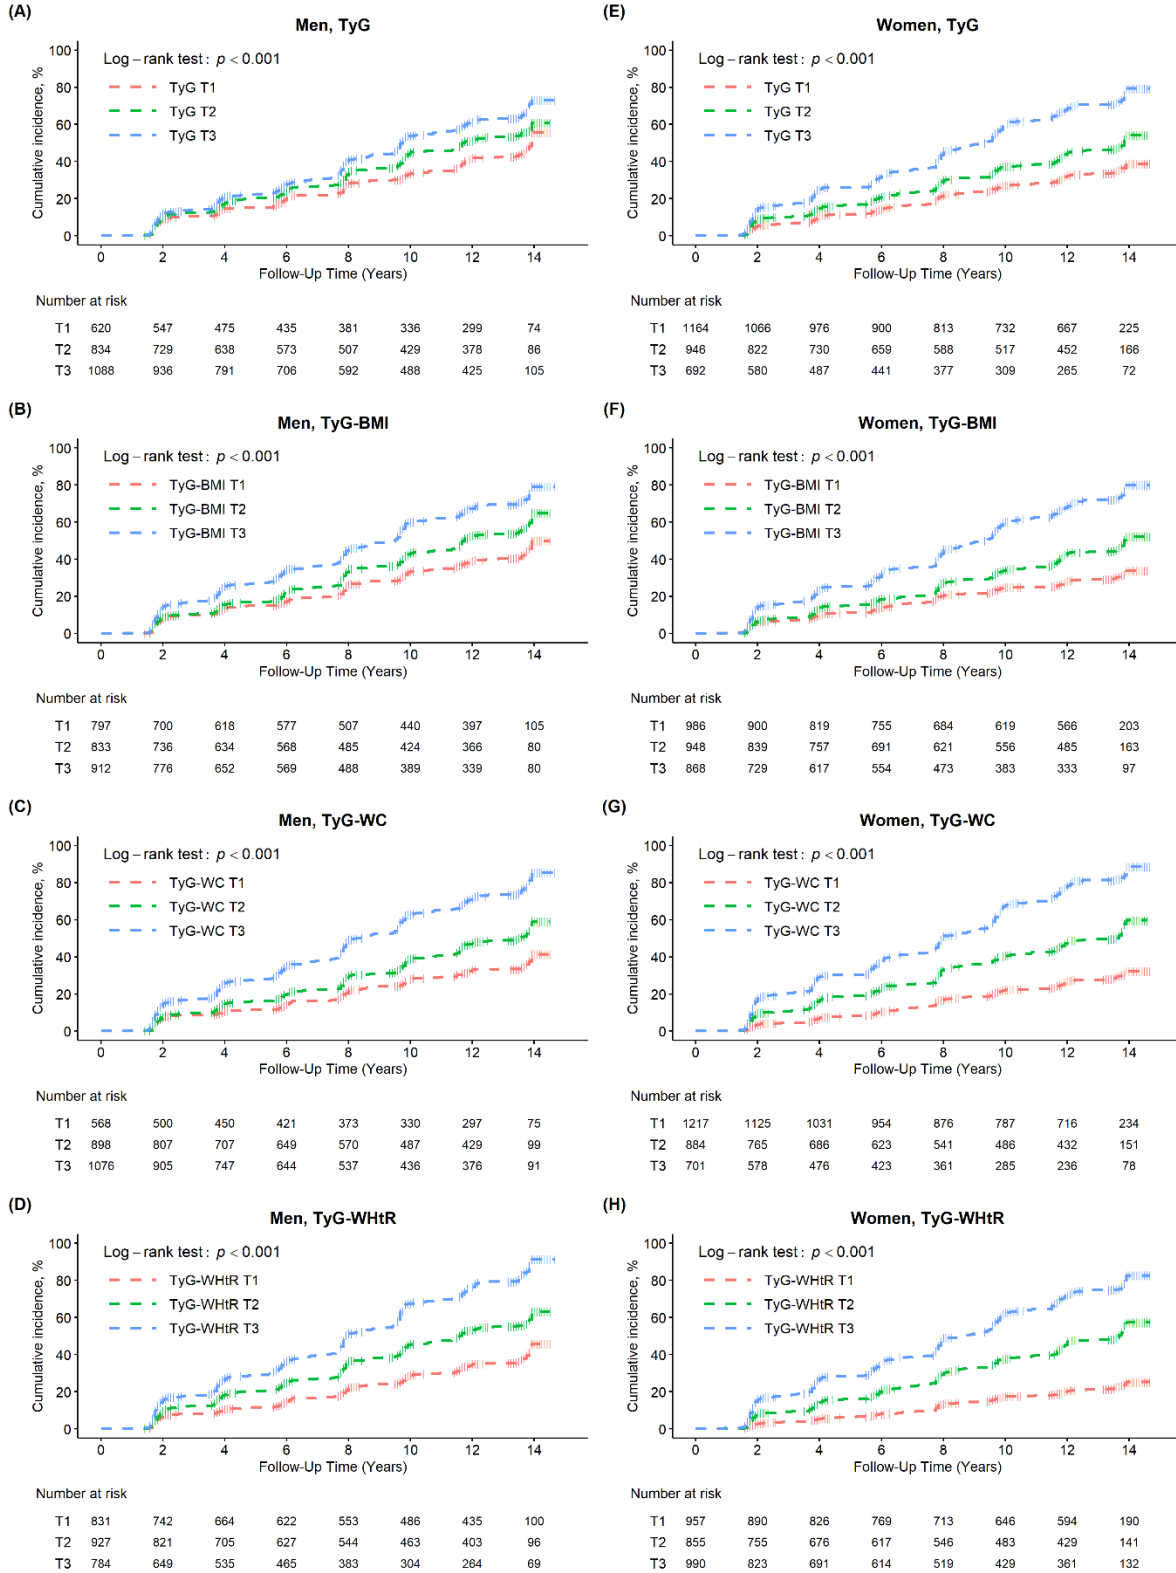



Relationship between incident HTN in men and TyG tertile (A), TyG-BMI (B), TyG-WC (C), and TyG-WHtR (D). Relationship between incident HTN in women and TyG tertile (E), TyG-BMI (F), TyG-WC (G), and TyG-WHtR (H) and

TyG, triglyceride to glucose index; BMI, body mass index; WC, waist circumference; WHtR, waist to height ratio; HTN, hypertension

**Figure S2. Subgroup analysis according to presence of diabetes.**

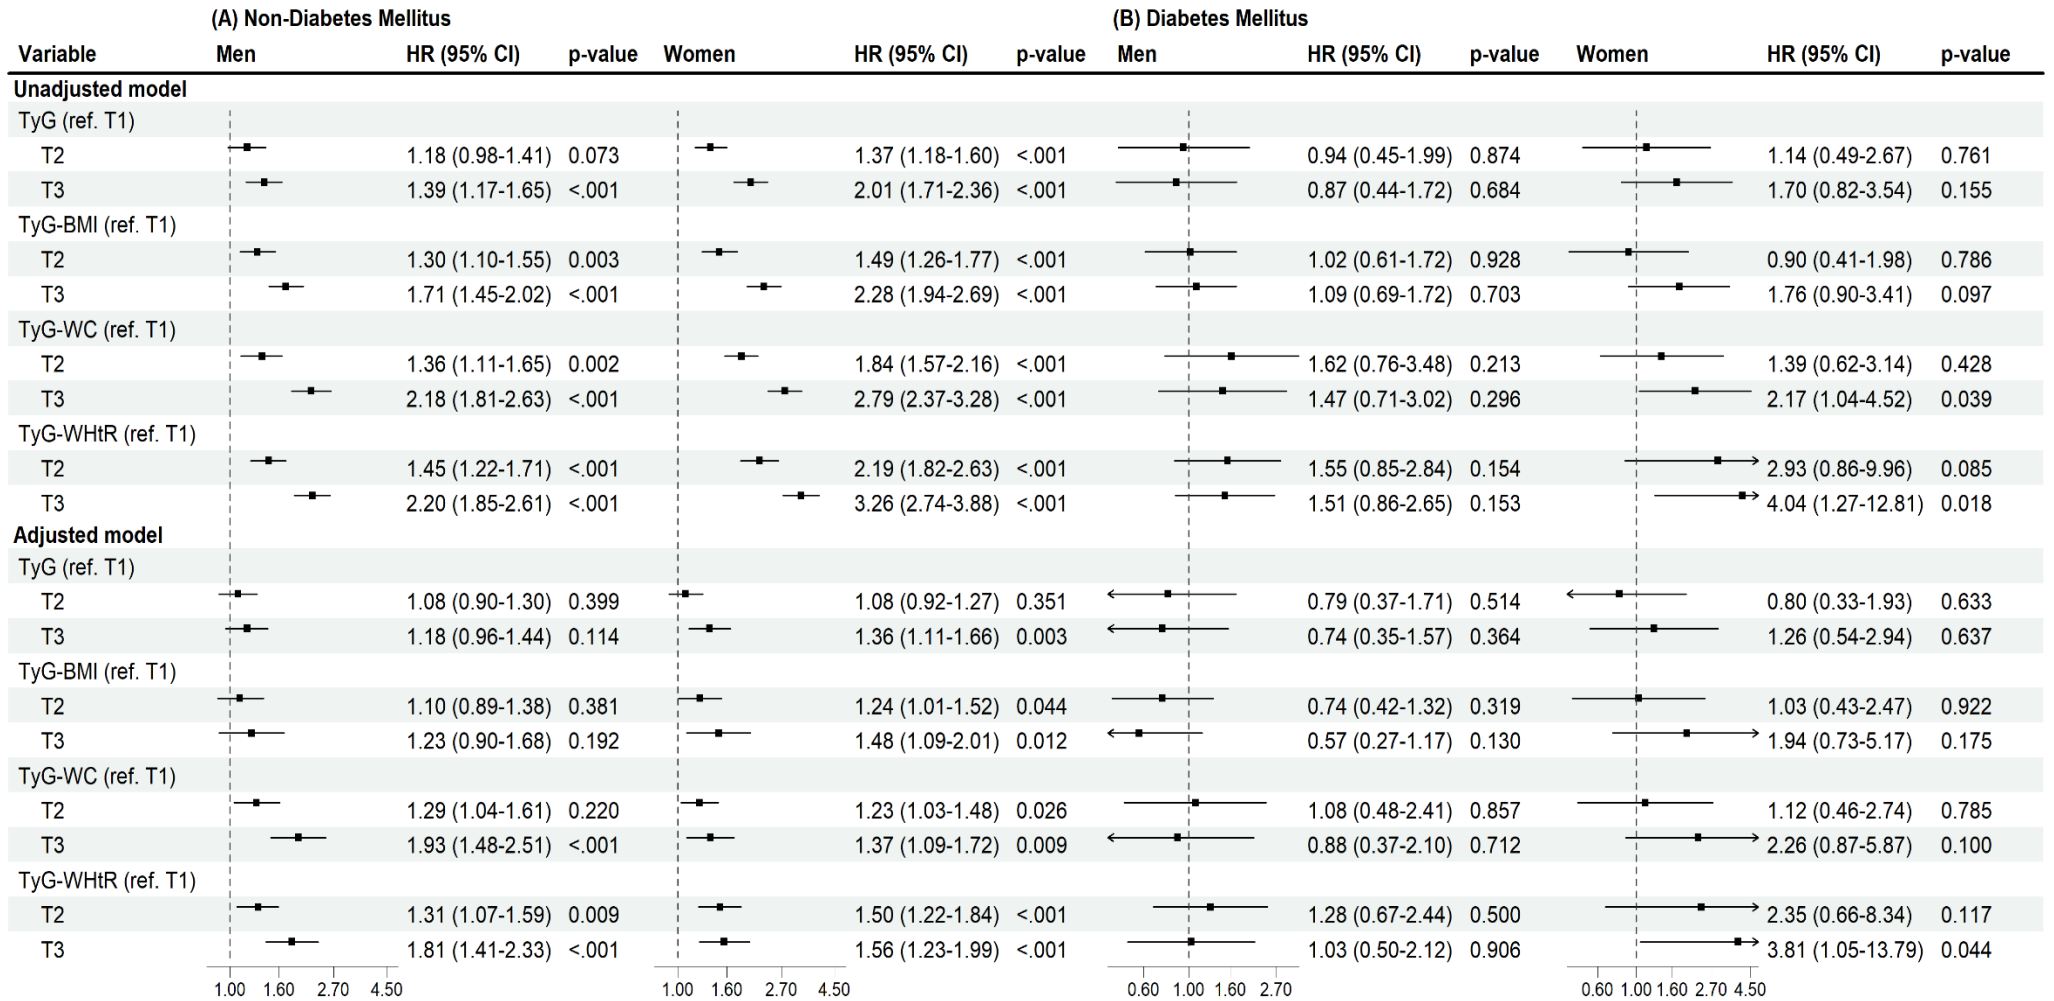

(A) Men and women without diabetes mellitus, (B) Men and women with diabetes mellitus

TyG, triglyceride-glucose; BMI, body mass index; WC, waist circumference; WHtR, waist to height ratio; TyG-BMI, TyG index × BMI; TyG-WC, TyG index × WC; TyG-WHtR, TyG index × WHtR
